# Supplementary material
Source: PubMed Central journal article supplement (PMC5503697)

# Supplementary Figure 1

Chr 22

## Identification of the candidate regions for Family 4 (GC14302) using the Homozygosity Haplotype approach

Five affected family members with SNP chip data were included in the analysis. A densitogram of the genomic Regions with a Conserved Homozygosity Haplotype (RCHHs) is depicted. The darker the color, the more individuals share a HH in the region. Black regions indicate RCHHs that are shared by all 5 affected family members included in the analysis

Chr 1

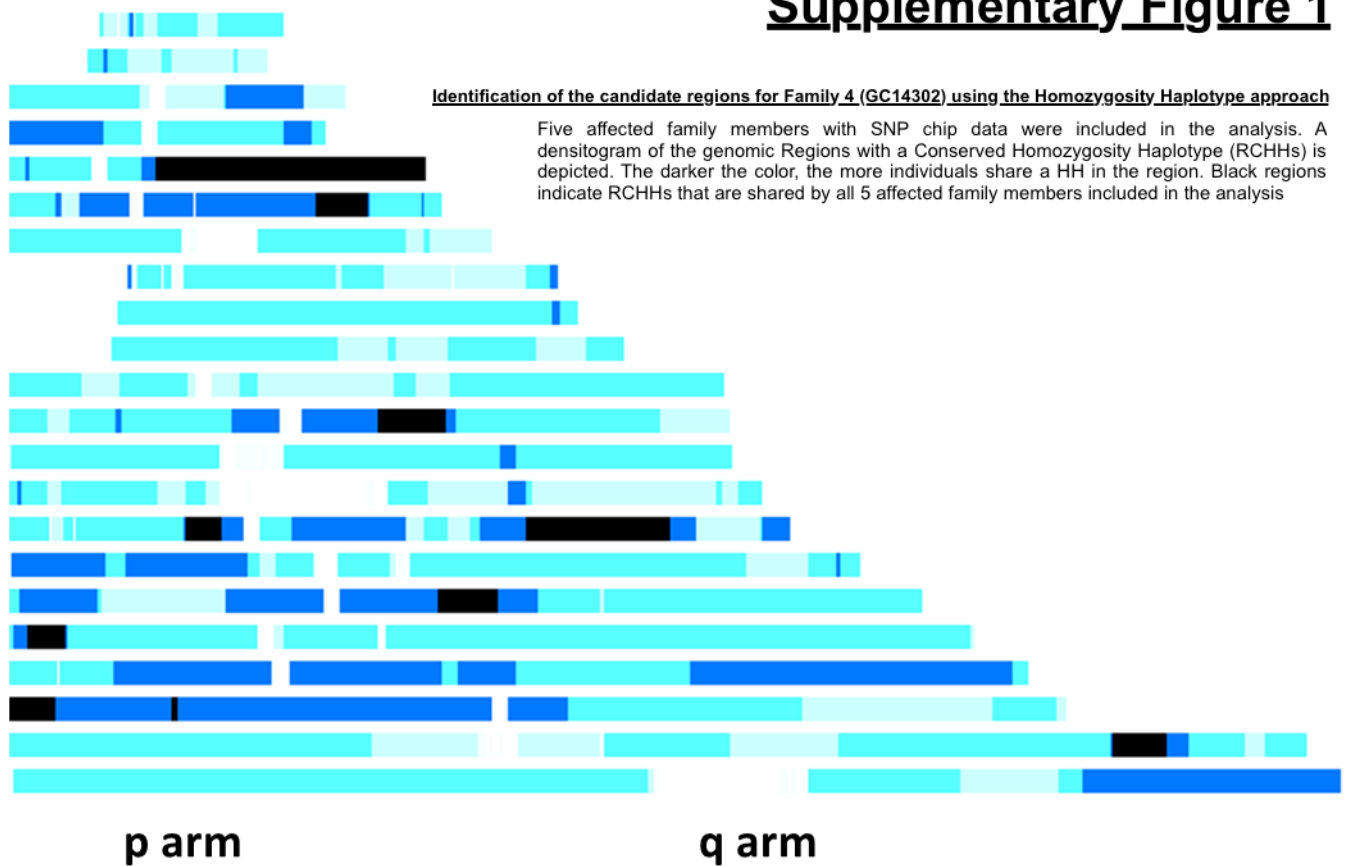

Supplement: NIHMS865515-supplement-1.pdf [file NIHMS865515-supplement-1.pdf]
