# Supplementary material
Source: PubMed Central journal article supplement (PMC5503697)
Supplement: NIHMS865515-supplement-3.pdf [file NIHMS865515-supplement-3.pdf]

# Supplementary Table 1

## Homozygosity Haplotype analysis of Family 4

| Chromosome | Physical position (bp) | start/end | SNP        | Genetic distance (cM) |
|------------|------------------------|-----------|------------|-----------------------|
| 2          | 206652963              | start     | rs3755232  | 213.82                |
| 2          | 216770807              | end       | rs11891588 | 223.84                |
| 3          | 61495                  | start     | rs13060385 | 0.00                  |
| 3          | 8808285                | end       | rs237897   | 22.56                 |
| 3          | 30590213               | start     | rs7616969  | 53.38                 |
| 3          | 31757599               | end       | rs3792549  | 54.80                 |
| 5          | 3339142                | start     | rs7703994  | 8.37                  |
| 5          | 10620274               | end       | rs879143   | 24.55                 |
| 6          | 80454831               | start     | rs2092745  | 89.15                 |
| 6          | 91531693               | end       | rs9351245  | 97.75                 |
| 8          | 33203726               | start     | rs1996363  | 61.52                 |
| 8          | 39850058               | end       | rs2543073  | 66.32                 |
| 8          | 96979871               | start     | rs10955055 | 107.65                |
| 8          | 123931864              | end       | rs16897667 | 131.52                |
| 11         | 69269768               | start     | rs7113550  | 74.86                 |
| 11         | 81842796               | end       | rs1892876  | 89.55                 |
| 17         | 57480798               | start     | rs7213065  | 83.10                 |
| 17         | 67336421               | end       | rs17687227 | 95.08                 |
| 18         | 27500959               | start     | rs9304548  | 49.08                 |
| 18         | 78015180               | end       | rs12960632 | 117.71                |
